# Supplementary material
Source: Springer Nature journal article supplement (https://www.springermedizin.de/resource/supplementary/12875_2013_1013_MOESM2_ESM.pdf/9435934)
Supplement: MOESM2 [file 9435934]

**Table 2. PHQ-9 severity and mean scores among study participants (N=10,179)**

|                                               | <b>Overall</b> | <b>Male</b> | <b>Female</b> |
|-----------------------------------------------|----------------|-------------|---------------|
| <b>PHQ-9 scores by severity (score range)</b> |                |             |               |
| Minimal (0-4)                                 | 61.1%          | 65.4%       | 59.0%         |
| Mild (5-9)                                    | 25.3%          | 24.5%       | 26.0%         |
| Moderate (10-14)                              | 7.5%           | 6.0%        | 8.3%          |
| Moderately severe(15-19)                      | 2.3%           | 1.6%        | 2.8%          |
| Severe (20-27)                                | 0.8%           | 0.6%        | 1.0%          |
| <b>Mean PHQ-9 scores by age and sex</b>       |                |             |               |
| 18-24 yrs                                     | 5.33           | 5.20        | 5.42          |
| 25-34 yrs                                     | 5.09           | 4.87        | 5.23          |
| 35-44 yrs                                     | 4.44           | 4.20        | 4.61          |
| 45-54 yrs                                     | 4.09           | 3.49        | 4.55          |
| 55-64 yrs                                     | 3.68           | 3.14        | 4.09          |
| 65+ yrs                                       | 3.57           | 3.01        | 3.98          |

*Note.* PHQ-9 scale score ranges from 0 to 27 with higher score indicating more frequent occurrence of depressive symptoms. A person scoring 10 or above is classified as PHQ-9screened positive.

Total count can be less than 100% due to missing information provided.
